# Supplementary material for: Sleep apnea is not associated with worse outcomes in kidney transplant recipients
Source: PubMed Central journal article supplement (PMC5381499; doi:10.1038/srep06987), 2014-11-11

Title:

**Sleep apnea is not associated with worse outcomes in  
kidney transplant recipients**

Authors:

**Katalin Fornadi MD, PhD<sup>1\*</sup>, Katalin Zsuzsanna Ronai MD<sup>2\*</sup>,  
Csilla Zita Turanyi MD<sup>2</sup>, Tushar S Malavade, MD, MBBS, DNB<sup>3</sup>, Colin Michael  
Shapiro BSc, FRCPC, MBBCH, PhD<sup>4,5</sup>, Marta Novak MD, PhD<sup>2,4</sup>, Istvan Mucsi  
MD, PhD<sup>2,3,6</sup>, Miklos Z Molnar MD, PhD<sup>7</sup>**

From:

<sup>1</sup>Dept. of Neurology, Semmelweis University, Budapest, Hungary; <sup>2</sup>Institute of Behavioral Sciences, Semmelweis University, Budapest, Hungary; <sup>3</sup>Department of Medicine, Division of Nephrology, University Health Network, University of Toronto, Toronto; <sup>4</sup>Dept. of Psychiatry, University Health Network, University of Toronto, Toronto, Canada; <sup>5</sup>Dept. of Ophthalmology, University Health Network, University of Toronto, Toronto, Canada; <sup>6</sup>Institute of Pathophysiology, Semmelweis University, Budapest, Hungary; <sup>7</sup>Division of Nephrology, Department of Medicine, University of Tennessee Health Science Center, Memphis, TN, United States

**\* these authors contributed equally**

## SUPPLEMENT TABLES

**Table S1:** Predictors of rapid progression (>6 ml/min/1.73 m<sup>2</sup>/year) of graft function – multivariate analysis

| <i>Model 1</i>                              | <i>Odds ratio<br/>(OR)</i> | <i>Confidence<br/>interval of OR</i> | <i>p-value</i> |
|---------------------------------------------|----------------------------|--------------------------------------|----------------|
| AHI $\geq$ 5/h (vs AHI<5/h as reference)*   | 0.67                       | 0.25-1.85                            | 0.44           |
| <i>Model 2</i>                              | <i>Odds ratio<br/>(OR)</i> | <i>Confidence<br/>interval of OR</i> | <i>p-value</i> |
| AHI $\geq$ 15/h (vs AHI<15/h as reference)* | 0.97                       | 0.32-2.92                            | 0.96           |
| <i>Model 3</i>                              | <i>Odds ratio<br/>(OR)</i> | <i>Confidence<br/>interval of OR</i> | <i>p-value</i> |
| AHI $\geq$ 30/h (vs AHI<30/h as reference)* | 0.47                       | 0.09-2.35                            | 0.36           |
| <i>Model 4</i>                              | <i>Odds ratio<br/>(OR)</i> | <i>Confidence<br/>interval of OR</i> | <i>p-value</i> |
| AHI (+1/h increase)*                        | 0.99                       | 0.96-1.02                            | 0.50           |

\*Adjusted for age, presence of diabetes and serum albumin level

**Table S2:** Association between desaturation index and outcomes

|                                                                                         | <i>eGFR changes<br/>(ml/min/1.73<br/>m<sup>2</sup>/year)</i>                                                         | <i>Confidence interval<br/>of eGFR changes<br/>(ml/min/1.73<br/>m<sup>2</sup>/year)</i> | <i>p-value</i> |
|-----------------------------------------------------------------------------------------|----------------------------------------------------------------------------------------------------------------------|-----------------------------------------------------------------------------------------|----------------|
| <b>Patients with<br/>Desaturation index<br/>&lt;5/h</b>                                 | -1.04                                                                                                                | (-1.59) - (-0.48)                                                                       | 0.46           |
| <b>Patients with<br/>Desaturation index<br/>≥5/h</b>                                    | -1.30                                                                                                                | (-1.83) - (-0.76)                                                                       |                |
| <i>Model*</i>                                                                           | <i>Odds ratio (OR) of<br/>rapid progression<br/>(&gt;4 ml/min/1.73<br/>m<sup>2</sup>/year) of graft<br/>function</i> | <i>Confidence interval<br/>of OR</i>                                                    | <i>p-value</i> |
| <b>Desaturation index<br/>≥5/h (vs<br/>Desaturation index<br/>&lt;5/h as reference)</b> | 1.54                                                                                                                 | 0.64-3.73                                                                               | 0.34           |
| <b>Desaturation index<br/>(+1/hour)</b>                                                 | 0.99                                                                                                                 | 0.97-1.02                                                                               | 0.59           |

| <i>Model**</i>                                                                          | <i>Hazard ratio (HR)<br/>of all-cause<br/>mortality</i> | <i>Confidence interval<br/>of HR</i> | <i>p-value</i> |
|-----------------------------------------------------------------------------------------|---------------------------------------------------------|--------------------------------------|----------------|
| <b>Desaturation index<br/>≥5/h (vs<br/>Desaturation index<br/>&lt;5/h as reference)</b> | 1.61                                                    | 0.73-3.56                            | 0.24           |
| <b>Desaturation index<br/>(+1/hour)</b>                                                 | 1.01                                                    | 0.98-1.03                            | 0.57           |
| <i>Model*</i>                                                                           | <i>Odds ratio (OR) of<br/>combined outcome</i>          | <i>Confidence interval<br/>of OR</i> | <i>p-value</i> |
| <b>Desaturation index<br/>≥5/h (vs<br/>Desaturation index<br/>&lt;5/h as reference)</b> | 1.02                                                    | 0.42-2.46                            | 0.97           |
| <b>Desaturation index<br/>(+1/hour)</b>                                                 | 0.99                                                    | 0.97-1.02                            | 0.56           |

\*: Model adjusted for age, serum albumin and presence of diabetes

\*\* : Unadjusted model

**Table S3:** Association between OSA and outcomes in females and males

|                                                 | <i>eGFR changes<br/>(ml/min/1.73<br/>m<sup>2</sup>/year)</i>                                                         | <i>Confidence interval<br/>of eGFR changes<br/>(ml/min/1.73<br/>m<sup>2</sup>/year)</i> | <i>p-values</i>                |
|-------------------------------------------------|----------------------------------------------------------------------------------------------------------------------|-----------------------------------------------------------------------------------------|--------------------------------|
|                                                 | Females                                                                                                              |                                                                                         | p for gender interaction: 0.72 |
| <b>AHI ≥15/h</b>                                | -0.23                                                                                                                | (-2.87) - (2.40)                                                                        | 0.51                           |
| <b>AHI &lt;15/h</b>                             | -1.24                                                                                                                | (-1.84) - (-0.63)                                                                       |                                |
|                                                 | Males                                                                                                                |                                                                                         |                                |
| <b>AHI ≥15/h</b>                                | -0.95                                                                                                                | (-1.79) - (-0.11)                                                                       | 0.46                           |
| <b>AHI &lt;15/h</b>                             | -1.33                                                                                                                | (-1.94) - (-0.72)                                                                       |                                |
| <i>Model*</i>                                   | <i>Odds ratio (OR) of<br/>rapid progression<br/>(&gt;4 ml/min/1.73<br/>m<sup>2</sup>/year) of graft<br/>function</i> | <i>Confidence interval<br/>of OR</i>                                                    | <i>p-values</i>                |
|                                                 | Female                                                                                                               |                                                                                         | p for gender interaction: 0.43 |
| <b>AHI ≥15/h (vs AHI &lt;15/h as reference)</b> | 0.59                                                                                                                 | 0.49-6.99                                                                               | 0.67                           |
|                                                 | Male                                                                                                                 |                                                                                         |                                |
| <b>AHI ≥15/h (vs AHI &lt;15/h as reference)</b> | 0.79                                                                                                                 | 0.23-2.70                                                                               | 0.71                           |

|                                                     |                                                         |                                      |                                   |
|-----------------------------------------------------|---------------------------------------------------------|--------------------------------------|-----------------------------------|
| <15/h as reference)                                 |                                                         |                                      |                                   |
| <b>Model**</b>                                      | <b>Hazard ratio (HR)<br/>of all-cause<br/>mortality</b> | <b>Confidence interval<br/>of HR</b> | <b>p-values</b>                   |
|                                                     | Female                                                  |                                      | p for gender<br>interaction: 0.36 |
| <b>AHI ≥15/h (vs AHI<br/>&lt;15/h as reference)</b> | 4.36                                                    | 0.87-21.82                           | 0.07                              |
|                                                     | Male                                                    |                                      |                                   |
| <b>AHI ≥15/h (vs AHI<br/>&lt;15/h as reference)</b> | 0.63                                                    | 0.23-1.78                            | 0.38                              |
| <b>Model*</b>                                       | <b>Odds ratio (OR) of<br/>combined outcome</b>          | <b>Confidence interval<br/>of OR</b> | <b>p-value</b>                    |
|                                                     | Female                                                  |                                      | p for gender<br>interaction: 0.80 |
| <b>AHI ≥15/h (vs AHI<br/>&lt;15/h as reference)</b> | 4.44                                                    | 0.38-51.96                           | 0.24                              |
|                                                     | Male                                                    |                                      |                                   |
| <b>AHI ≥15/h (vs AHI<br/>&lt;15/h as reference)</b> | 0.52                                                    | 0.15-1.77                            | 0.29                              |

\*: Model adjusted for age, serum albumin and presence of diabetes

\*\* : Unadjusted model



## SUPPLEMENT FIGURE

**Figure S1:** Flow chart of the patient selection

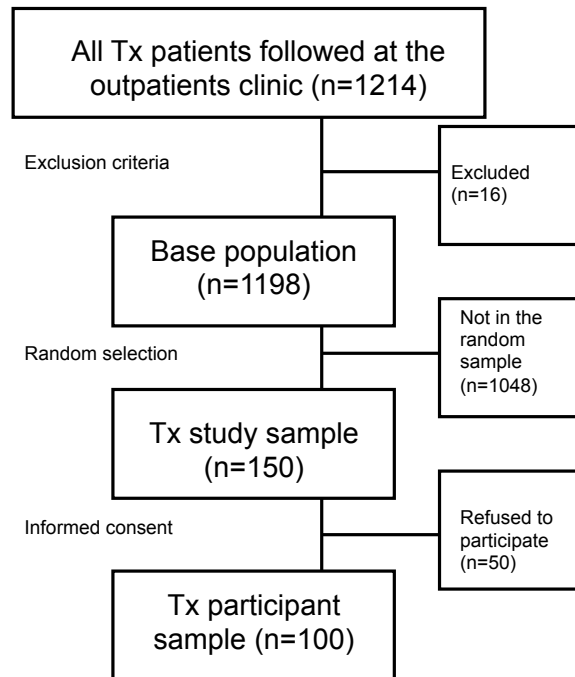

Supplement: srep06987-s1.pdf [file srep06987-s1.pdf]
